# Supplementary material for: Single-atom Ce synergizes icosahedral Pt 2 Ce nanoparticles to promote performance enhancement for zinc–air batteries
Source: Royal Society of Chemistry journal article supplement (doi:10.1039/d5ta08054a), 2026-01-01
Supplement: d5ta08054a1.pdf [file d5ta08054a1.pdf]

## 1 Supporting Information

2

### 3 **Ce single-atom synergizes icosahedral Pt<sub>2</sub>Ce nanoparticles to** 4 **promote performance enhancement for zinc-air battery**

5 Huiqi Zhang<sup>a</sup>, Ying Chang<sup>a\*</sup>, Shaohong Guo<sup>a</sup>, Yaqiong Su<sup>b\*</sup>, Jingchun Jia<sup>a\*</sup>, Meilin Jia<sup>a</sup>

6 *a College of Chemistry and Environmental Science, Inner Mongolia Key Laboratory of Green*

7 *Catalysis and Inner Mongolia Collaborative Innovation Center for Water Environment Safety,*

8 *Inner Mongolia Normal University, Hohhot, 010022, China.*

9 *b School of Chemistry, Engineering Research Center of Energy Storage Materials and Devices of*

10 *Ministry of Education, National Innovation Platform (Center) for Industry-Education Integration*

11 *of Energy Storage Technology, Xi'an Jiaotong University, Xi'an 710049, China*

12 *\*Corresponding author. E-mail: changying@imu.edu.cn, jjc1983@126.com,*

13 *yqsu1989@xjtu.edu.cn*

## 14 Experimental Section

### 15 Chemicals

16 The chemicals required for the experiment can be used directly  
17 without further purification. Zn(NO<sub>3</sub>)<sub>2</sub>·6H<sub>2</sub>O (Tianjin Guangfu  
18 Technology Development Co., Ltd., 99%), Ce(NO<sub>3</sub>)<sub>3</sub>·6H<sub>2</sub>O (Adamas  
19 Reagents Co., Ltd., 99%), 2-methylimidazole (Adamas Reagents Co., Ltd.,  
20 98%), methanol (Tianjin Zhiyuan Chemical Reagent Co., Ltd., AR),  
21 ethanol (Tianjin Zhiyuan Chemical Reagent Co., Ltd., AR), KB-300  
22 (Suzhou Yilongsheng Energy Technology Co., Ltd.), Pt(acac)<sub>2</sub> (Aladdin  
23 Reagents Co., Ltd., 97%), Ce(acac)<sub>3</sub> (Aladdin Reagents Co., Ltd., 98%),  
24 HNO<sub>3</sub> (Chengdu Kelong Chemical Reagents Co., Ltd., AR), H<sub>2</sub>SO<sub>4</sub>

(Chengdu Kelong Chemical Reagents Co., Ltd., AR),  $\text{CHCl}_3$  (Chengdu Kelong Chemical Reagents Co., Ltd., AR),  $\text{Zn}(\text{OAc})_2$  (Adamas Reagents Co., Ltd., 99%), KOH (Sinopharm Chemical Reagents Co., Ltd., 90%), Nafion (Adamas Reagents Co., Ltd., 5 wt%), Pt/C (Shanghai Hesent Electric Co., 20 wt%).

### **Synthesis of Ce-ZIF-8**

In a typical synthesis, 1.16 g  $\text{Zn}(\text{NO}_3)_2 \cdot 6\text{H}_2\text{O}$  (0.004 mol) and 0.18 g  $\text{Ce}(\text{NO}_3)_3 \cdot 6\text{H}_2\text{O}$  (0.0004 mol) were dissolved in 30 mL of methanol, and sonicated to form a uniform mixed solution A, 2-methylimidazole was dissolved in the same volume of methanol to form solution B, solution B was poured into solution A and stirred for 6 h at room temperature, the precipitates were centrifuged and washed with methanol 3 times, and dried in vacuum at 70 °C for overnight to obtain Ce-ZIF-8.

### **Synthesis of CeNC**

The powder of Ce-ZIF-8 was placed in a tube furnace and carbonized under flowing Ar for 2h at 900 °C with the heating rate of 5 °C min<sup>-1</sup> and then naturally cooled down to room temperature to obtain the CeNC.

### **Synthesis of Pt<sub>2</sub>Ce/CeNC-600**

5 mg CeNC, 50 mg KB-300, 47.2 mg  $\text{Pt}(\text{acac})_2$  (0.00012 mol), 26.2 mg  $\text{Ce}(\text{acac})_3$  (0.00006 mol) were co-dissolved in 10 ml  $\text{CHCl}_3$  and stirred overnight at room temperature, the product was calcined under flowing Ar for 2h at 600 °C with the heating rate of 5 °C min<sup>-1</sup>. The product was post-

47 processed by acid etching with 0.5 M HNO<sub>3</sub> at 70 °C for 2 h, centrifuged  
48 and washed twice with ethanol, dried at 50°C for 24 h, and finally calcined  
49 under flowing Ar for 2h at 300 °C with the heating rate of 5 °C min<sup>-1</sup> to  
50 obtain Pt<sub>2</sub>Ce/CeNC-600.

#### 51 **Synthesis of Pt<sub>2</sub>Ce/C**

52 55 mg KB-300, 47.2 mg Pt(acac)<sub>2</sub>, 26.2 mg Ce(acac)<sub>3</sub> were co-  
53 dissolved in 10 ml CHCl<sub>3</sub>, the remaining steps were the same as for the  
54 synthesis of Pt<sub>2</sub>Ce/CeNC-600.

#### 55 **Synthesis of Pt/CeNC**

56 5 mg CeNC, 50 mg KB-300, 70 mg Pt(acac)<sub>2</sub> were co-dissolved in 10  
57 ml CHCl<sub>3</sub>, the remaining steps were the same as for the synthesis of  
58 Pt<sub>2</sub>Ce/CeNC-600.

#### 59 **Characterizations**

60 The morphology of the samples were observed by field emission  
61 scanning electron microscopy (SEM, Germany-Zeiss-GeminiSEM 360  
62 and USA-FEI-Quanta FEG 250 + Oxford Energy Spectroscopy) and field  
63 emission transmission electron microscopy (TEM, Japan-JEOL-JEM-  
64 2100F). Spherical aberration corrected transmission electron microscopy  
65 (AC-STEM) were taken on a USA-Thermo Fisher Scientific-Titan Themis  
66 G2 60-300. The structure and crystallinity were investigated by X-ray  
67 diffraction (XRD, Germany-Bruker-D8 ADVANCE and Rigaku Ultima  
68 IV). The chemical composition and electronic valence states were analyzed

69 by X-ray photoelectron spectroscopy (XPS, USA-Thermo SCIENTIFIC  
70 ESCALAB 250Xi). X-ray absorption spectroscopy (XAS) measurements  
71 and data analyses were performed at Beijing Synchrotron Radiation-  
72 Absorption Spectroscopy XAFS (EXAFS+XANES).

### 73 **Electrochemical ORR analysis**

74 The tests were performed with a AutoLab electrochemical  
75 workstation and a rotating disk electrode device. The tests were performed  
76 using a three-electrode system, with the rotating disk electrode (RDE) and  
77 the rotating ring-disk electrode (RRDE) as the working electrodes (WE),  
78 the Ag/AgCl electrode as the reference electrode (RE) and the platinum  
79 wire as the counter electrode (CE). 0.5 M H<sub>2</sub>SO<sub>4</sub> was used as the  
80 electrolyte, prior to testing, 30 min of O<sub>2</sub> or Ar was passed through the  
81 electrolyte to remove the impurity gases from the electrolyte. Preparation  
82 of catalyst ink: dissolve 2 mg of catalyst powder in 400 μL mixed solution  
83 (V<sub>Nafion</sub>: V<sub>DI</sub>: V<sub>ethanol</sub> = 1:9:10), and ultrasonicate for 30 minutes to ensure  
84 the solution is thoroughly mixed. Before the ORR test, 16μL catalyst slurry  
85 was coated on the working electrode. For ORR, the Pt loadings on the  
86 electrode of Pt<sub>2</sub>Ce/CeNC-600 and Pt/C are 88.4 and 81.6 μg/cm<sup>2</sup>. Tests  
87 included cyclic voltammetry (CV), linear sweep voltammetry (LSV),  
88 transfer electron number, hydrogen peroxide yield and accelerated  
89 durability test (ADT). The CV potential was in the range of -0.2-1 V with  
90 a sweep rate of 100 mV/s. The LSV potential was in the range of -0.2-1 V

91 with a sweep rate of 10 mV/s, and the curves under oxygen atmosphere are  
 92 2500, 2025, 1600, 1225, 900 and 625 rpm. The ADT is the change in LSV  
 93 before and after 1000 CV cycles. All potentials were converted versus  
 94 reversible hydrogen electrode (RHE) with the equation:

$$95 \quad E_{RHE} = E_{Ag/AgCl} + (0.197 + 0.0591 \text{ pH}) V$$

96 The electron transfer number (n) for ORR was determined using Koutecky-  
 97 Levich (K-L) analysis (equation (1)):

$$98 \quad \frac{1}{j} = \frac{1}{j_L} + \frac{1}{j_K} = \frac{1}{B\omega^{\frac{1}{2}}} + \frac{1}{j_K} \quad (1)$$

99 where j, j<sub>K</sub> and j<sub>L</sub> represent measured, kinetic, and diffusion-limited current  
 100 densities, respectively. j<sub>K</sub> is a constant at a certain potential and j<sub>L</sub> is  
 101 proportional to the square root of angular velocity (ω) of the rotation disk  
 102 electrode. The proportionality coefficient (B) is given by equation (2):

$$103 \quad B = 0.62nFC_0D_0^{2/3}v^{-1/6} \quad (2)$$

104 where n is the number of electrons transferred in the ORR, F is the Faraday  
 105 constant (96,485C mol<sup>-1</sup>), C<sub>0</sub> is the bulk concentration of O<sub>2</sub> (1.1 × 10<sup>-3</sup> mol  
 106 cm<sup>-3</sup>), D<sub>0</sub> is the diffusion coefficient of O<sub>2</sub> (1.93 × 10<sup>-5</sup> cm<sup>2</sup> s<sup>-1</sup>), and v is the  
 107 kinematic viscosity of the electrolyte (0.01 cm<sup>2</sup> S<sup>-1</sup>).

108 H<sub>2</sub>O<sub>2</sub> yield:

$$109 \quad H_2O_2\% = 200 \times \frac{\frac{I_R}{N}}{I_D + \frac{I_R}{N}} \quad (3)$$

110 Electron transfer number :

$$n = 4 \times \frac{I_D}{I_D + \frac{I_R}{N}} \quad (4)$$

112 Where  $I_R$  represents the ring current,  $I_D$  represents the disk current,  
113 and  $N$  is the current collection efficiency of Pt ring electrode.

#### 114 **Zinc air battery testing**

115 A polished metallic zinc foil ( $6.5 \text{ cm} \times 1 \text{ cm} \times 0.3 \text{ mm}$ ) was used as  
116 the anode, a carbon paper-nickel foam composite loaded with  
117  $\text{Pt}_2\text{Ce/CeNC-600}$  was used as the air cathode, and the electrolyte was a  
118 mixed solution containing 6 M KOH, 0.2 M  $\text{Zn(OAc)}_2$  and 500 ml  
119 ultrapure water. Preparation of catalyst ink: dissolve 5 mg of catalyst  
120 powder in 1000  $\mu\text{L}$  mixed solution ( $V_{\text{Nafion}}: V_{\text{DI}}: V_{\text{ethanol}} = 1:9:10$ ), and  
121 ultrasonicate for 30 minutes to ensure the solution is thoroughly mixed.  
122 Prepare a  $3.5 \text{ cm} \times 6.5 \text{ cm}$  carbon paper-nickel foam composite, at the  
123 center point ( $1 \text{ cm} \times 1 \text{ cm}$ ), evenly apply 200  $\mu\text{L}$  of catalyst ink in four  
124 separate applications and allow it to dry. The Pt loadings on the carbon  
125 paper-nickel foam composite of  $\text{Pt}_2\text{Ce/CeNC-600}$  and Pt/C are 216.7 and  
126 200.0  $\mu\text{g}/\text{cm}^2$ . The discharge polarization curves and power density curves  
127 of the cells were tested using CHI 760E. The discharge curves at different  
128 current densities and galvanostatic discharge-charge cycle profiles of the  
129 battery were tested using LAND CT2001A. A complete charge-discharge  
130 cycle takes 20 min.

## 131 **Computational details**

132 All calculations were performed using the plane-wave periodic DFT  
133 method in the Vienne ab initio simulation package (VASP). The electron  
134 energies used the generalized gradient approximation in the Perdew-  
135 Burke-Ernzerhof (GGA-PBE). The projector augmented wave (PAW)  
136 method is used to describe the electron-ion interaction. The cutoff energy  
137 was set as 400 eV to ensure the accurate energies. The Gaussian electron  
138 smearing method is used by  $\sigma = 0.05$  eV. The DFT lattice parameters for  
139 the Graphite bulk are  $a=2.459$  Å,  $b=2.459$  Å,  $c=6.800$  Å, The surface of  
140 (001) was modeled by periodic slabs with  $p(6\times6)$  unit cell. The vacuum  
141 layer was set as 12 Å to avoid interactions with other slabs. A  $3 \times 3 \times 1$   
142 Monkhorst-Pack k-point grid was used for sampling the Brillouin zone.  
143 The geometry optimization was done when the energy difference was  
144 lower than  $10^{-4}$  eV and the convergence criterion on forces smaller than  
145  $0.05$  eV/Å.

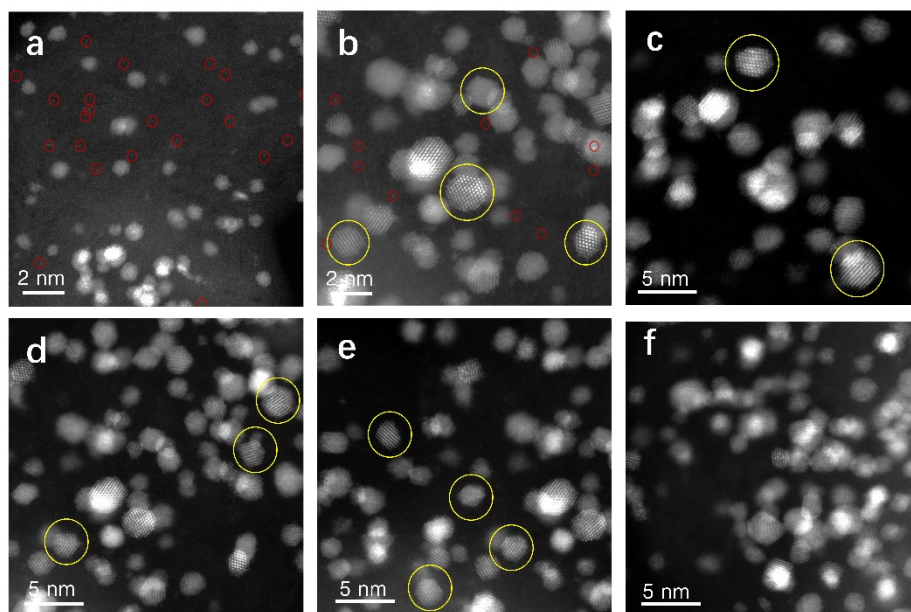

# 147 **Supplementary Figures**

148 **Figure S1.** AC-STEM images of Pt<sub>2</sub>Ce/CeNC-600.

149

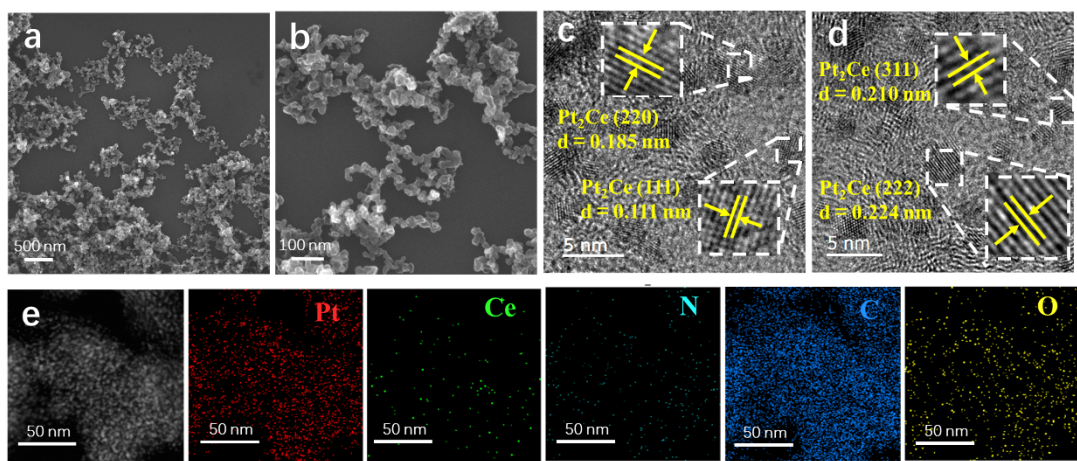

150 **Figure S2.** (a, b) SEM images of Pt<sub>2</sub>Ce/CeNC-600. (c, d) HRTEM  
 151 images of Pt<sub>2</sub>Ce/CeNC-600. (e) HAADF-STEM corresponding to EDS  
 152 mapping for Pt<sub>2</sub>Ce/CeNC-600.

153

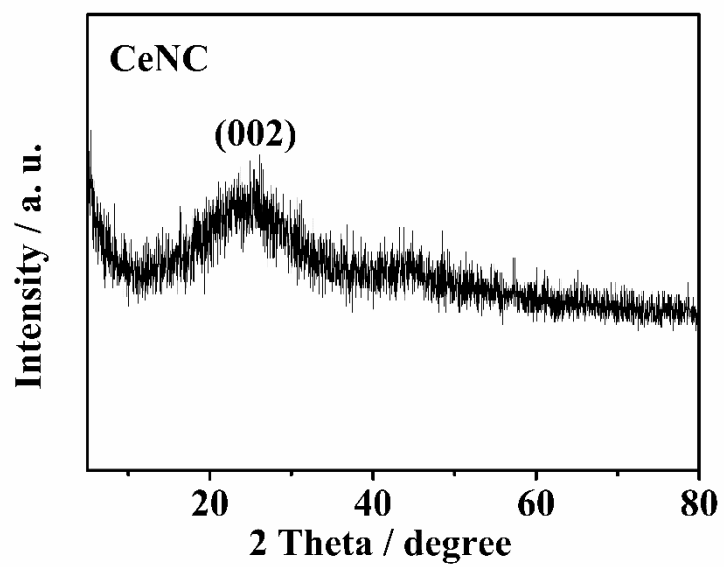

**Figure S3.** XRD of CeNC.

154

155

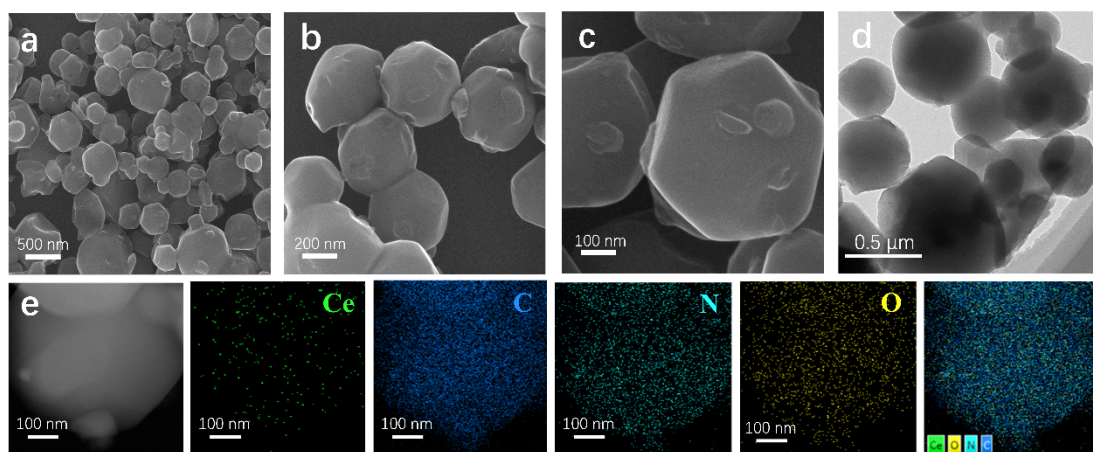

156 **Figure S4.** (a, b, c) SEM images of CeNC. (d) TEM image of CeNC.

157 (e) HAADF-STEM corresponding to EDS mapping for CeNC.

158

159

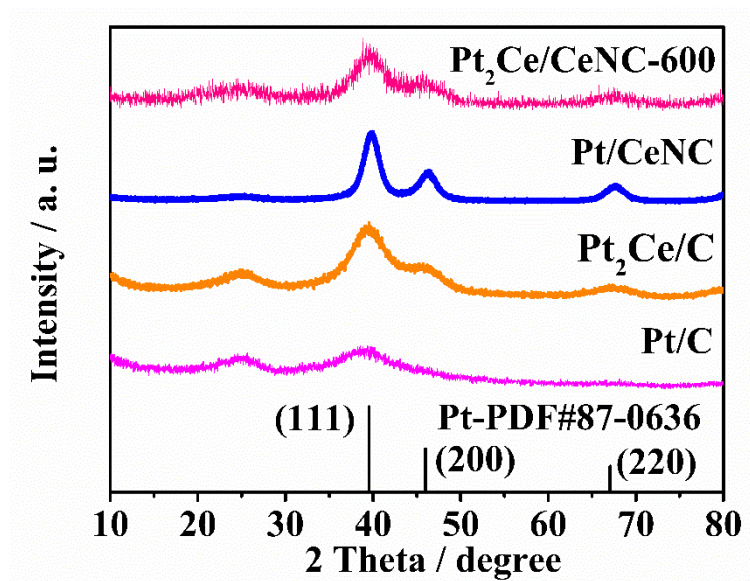

160 **Figure S5.** XRD of Pt<sub>2</sub>Ce/CeNC-600, Pt/CeNC, Pt<sub>2</sub>Ce/C and Pt/C.

161

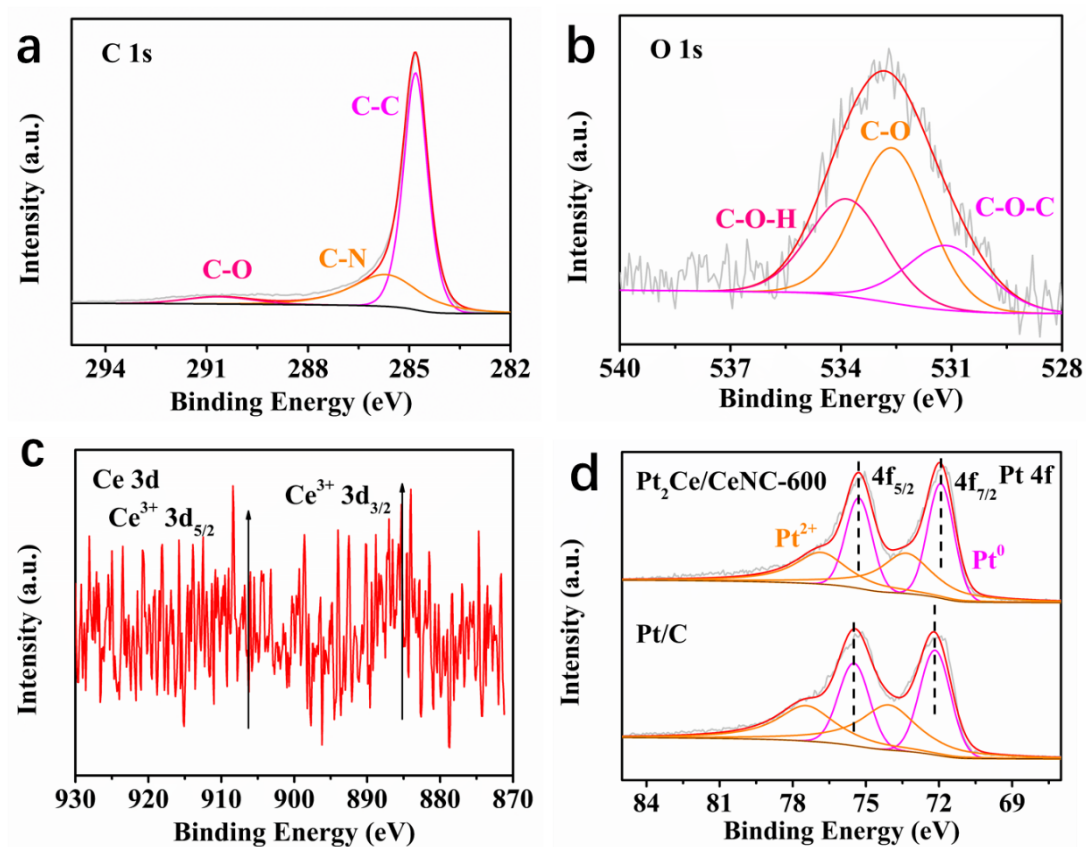

162 **Figure S6.** (a) C 1s XPS spectra of Pt<sub>2</sub>Ce/CeNC-600. (b) O 1s XPS  
 163 spectra of Pt<sub>2</sub>Ce/CeNC-600. (c) Ce 3d XPS spectra of Pt<sub>2</sub>Ce/CeNC-600.  
 164 (d) Pt 4f XPS spectra of Pt<sub>2</sub>Ce/CeNC-600 and Pt/C.

165

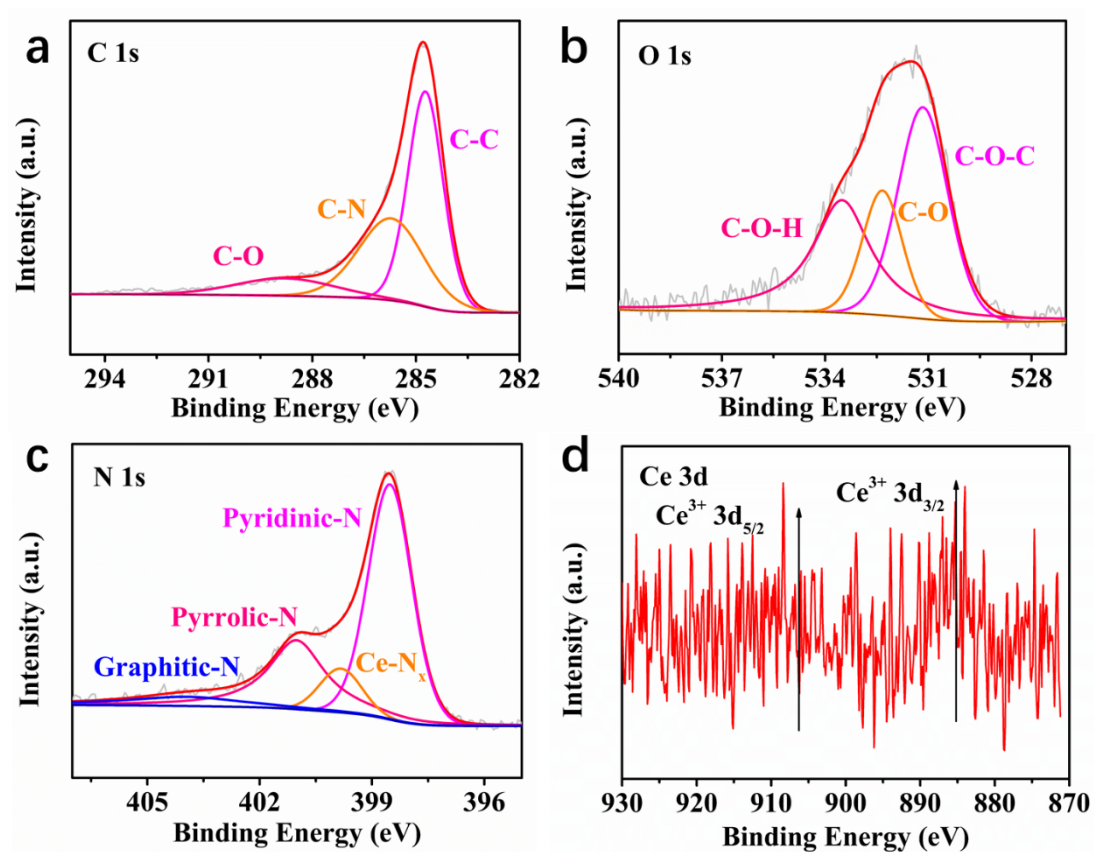

166 **Figure S7.** XPS spectra of CeNC. (a) C 1s XPS spectra. (b) O 1s XPS  
 167 spectra. (c) N 1s XPS spectra. (d) Ce 3d XPS spectra.

168

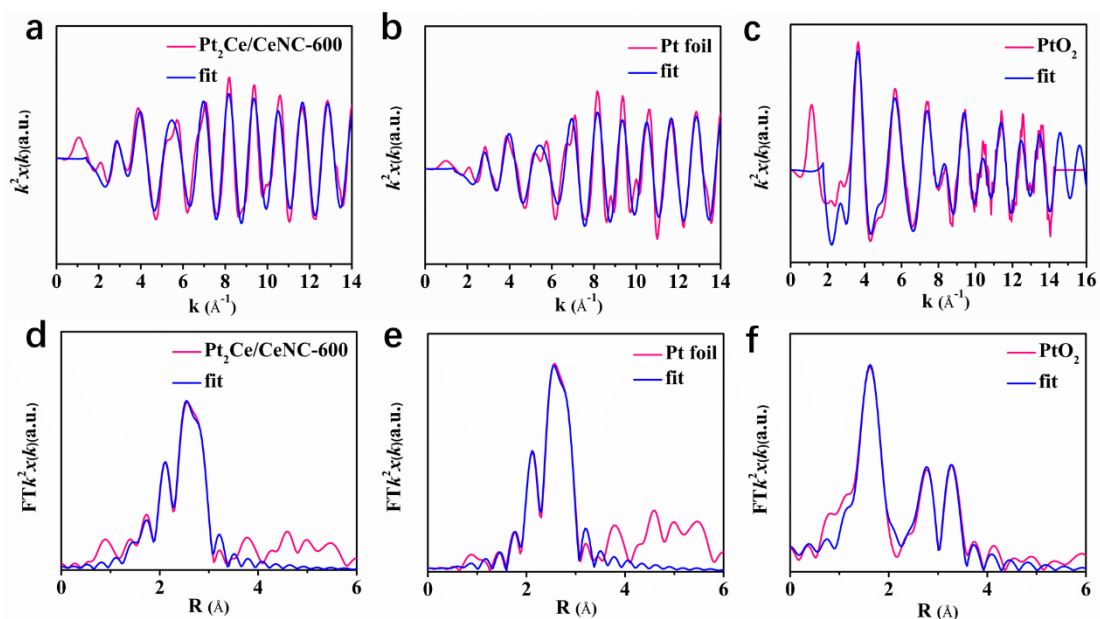

169 **Figure S8.** (a) k space FT-EXAFS fitting curves of Pt<sub>2</sub>Ce/CeNC-600. (b)  
 170 k space FT-EXAFS fitting curves of Pt foil. (c) k space FT-EXAFS fitting  
 171 curves of PtO<sub>2</sub>. (d) R space FT-EXAFS fitting curves of Pt<sub>2</sub>Ce/CeNC-600.  
 172 (e) R space FT-EXAFS fitting curves of Pt foil. (f) R space FT-EXAFS  
 173 fitting curves of PtO<sub>2</sub>.

174

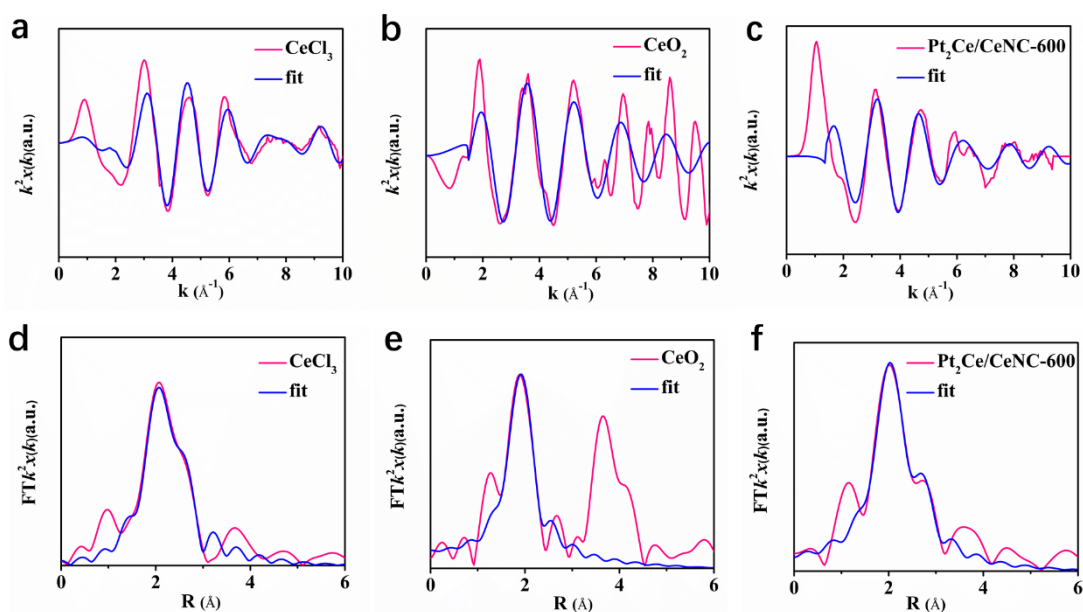

175 **Figure S9.** (a) k space FT-EXAFS fitting curves of  $\text{CeCl}_3$ . (b) k space  
 176 FT-EXAFS fitting curves of  $\text{CeO}_2$ . (c) k space FT-EXAFS fitting curves  
 177 of  $\text{Pt}_2\text{Ce/CeNC-600}$ . (d) R space FT-EXAFS fitting curves of  $\text{CeCl}_3$ . (e)  
 178 R space FT-EXAFS fitting curves of  $\text{CeO}_2$ . (f) R space FT-EXAFS fitting  
 179 curves of  $\text{Pt}_2\text{Ce/CeNC-600}$ .

180

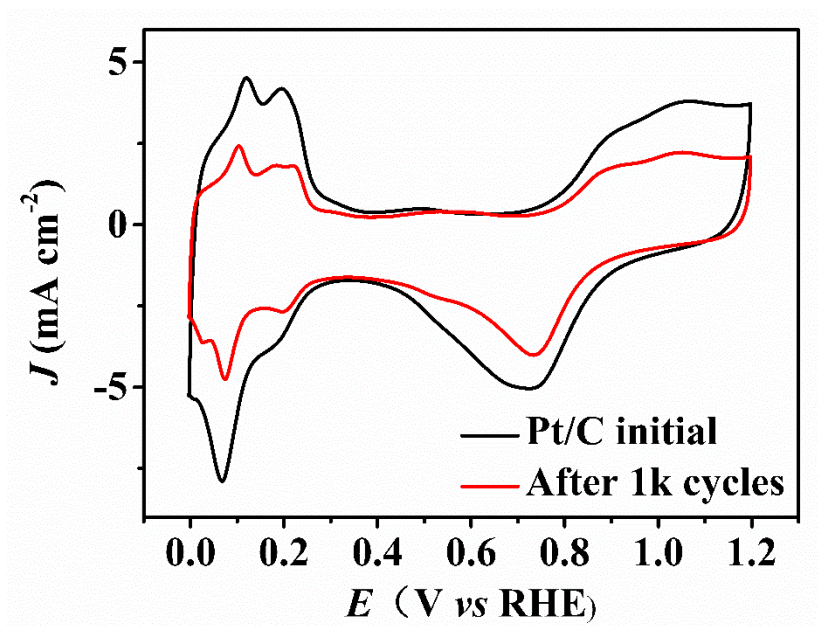

181 **Figure S10.** CV of Pt/C after 1k cycles.

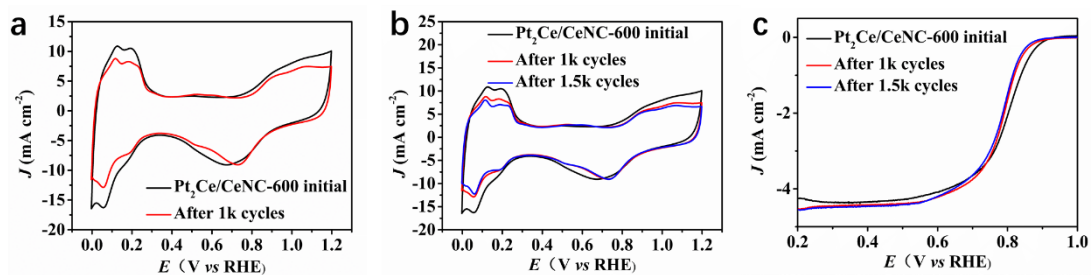

182 **Figure S11.** (a) CV of Pt<sub>2</sub>Ce/CeNC-600 after 1k cycles. (b) CV of  
 183 Pt<sub>2</sub>Ce/CeNC-600 after 1.5k cycles. (c) Durability test of Pt<sub>2</sub>Ce/CeNC-600  
 184 for 1.5k cycles.  
 185

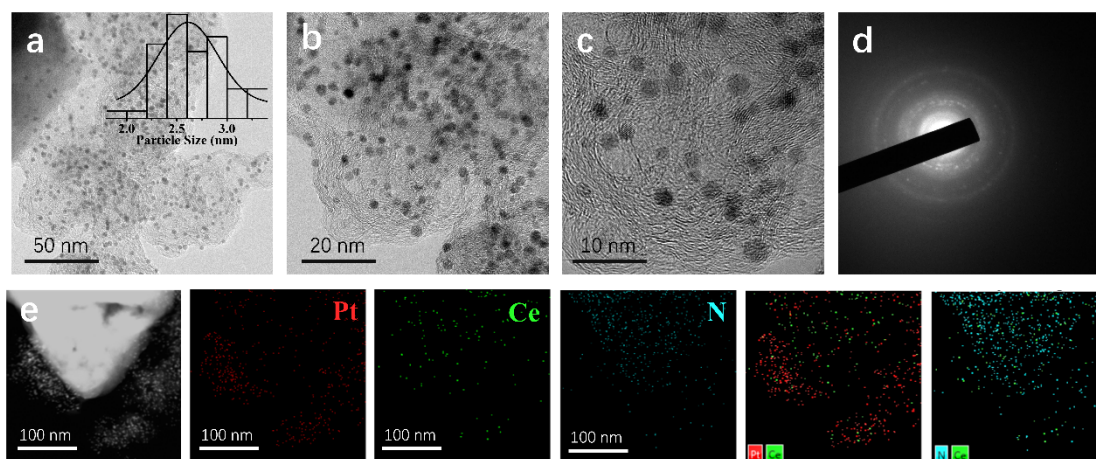

186 **Figure S12.** (a, b, c) TEM images of Pt<sub>2</sub>Ce/CeNC-600 after durability  
 187 test. The inset of (a) is histogram of particle size distribution of  
 188 Pt<sub>2</sub>Ce/CeNC-600 after durability. (d) SAED. (e) HAADF-STEM  
 189 corresponding to EDS mapping for Pt<sub>2</sub>Ce/CeNC-600 after durability.  
 190

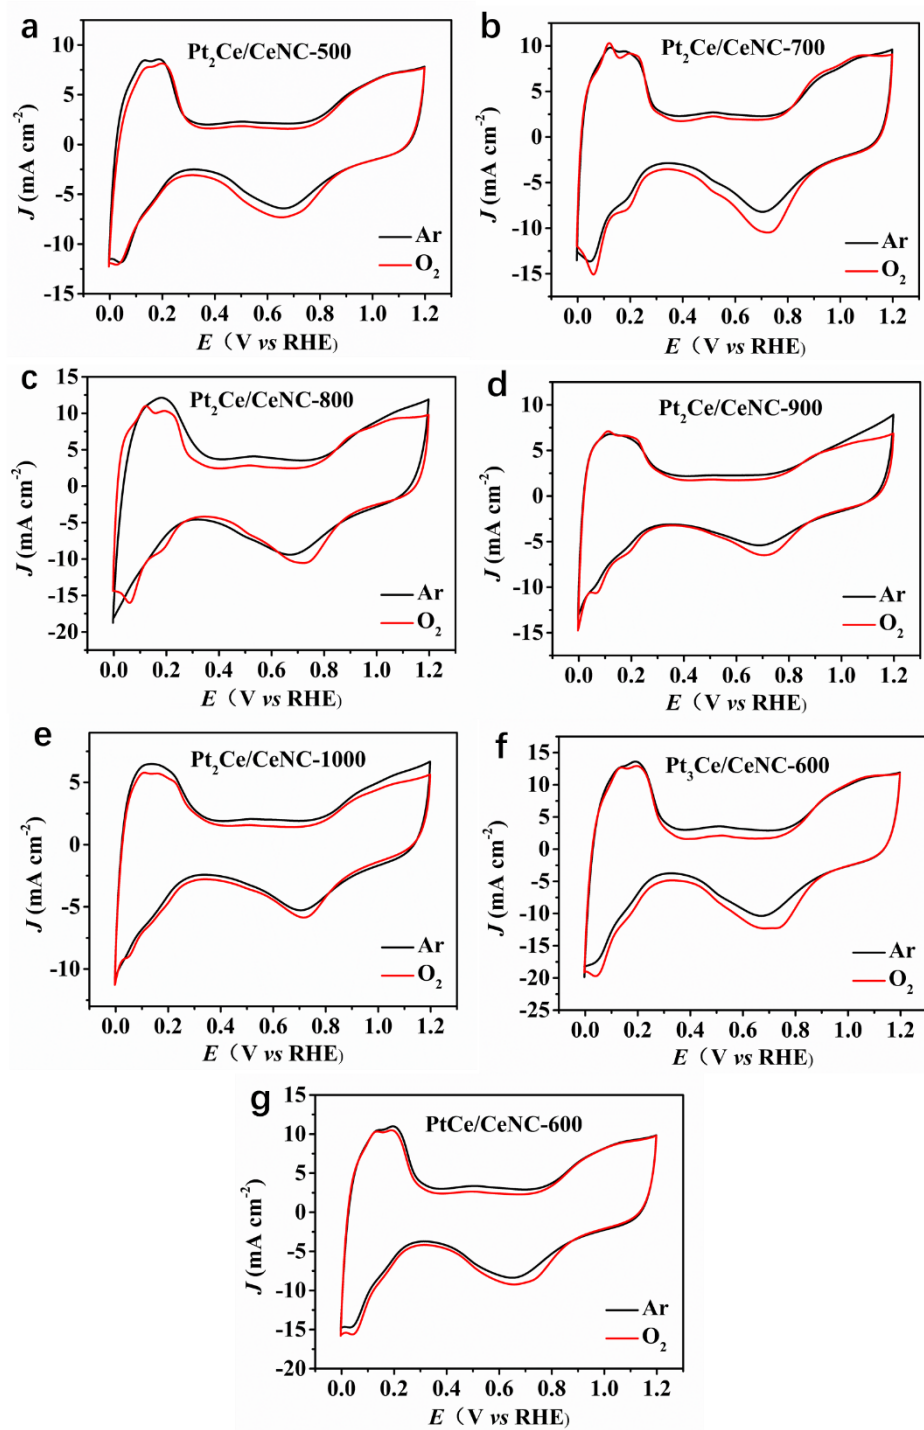

**Figure S13.** CV of all comparative samples.

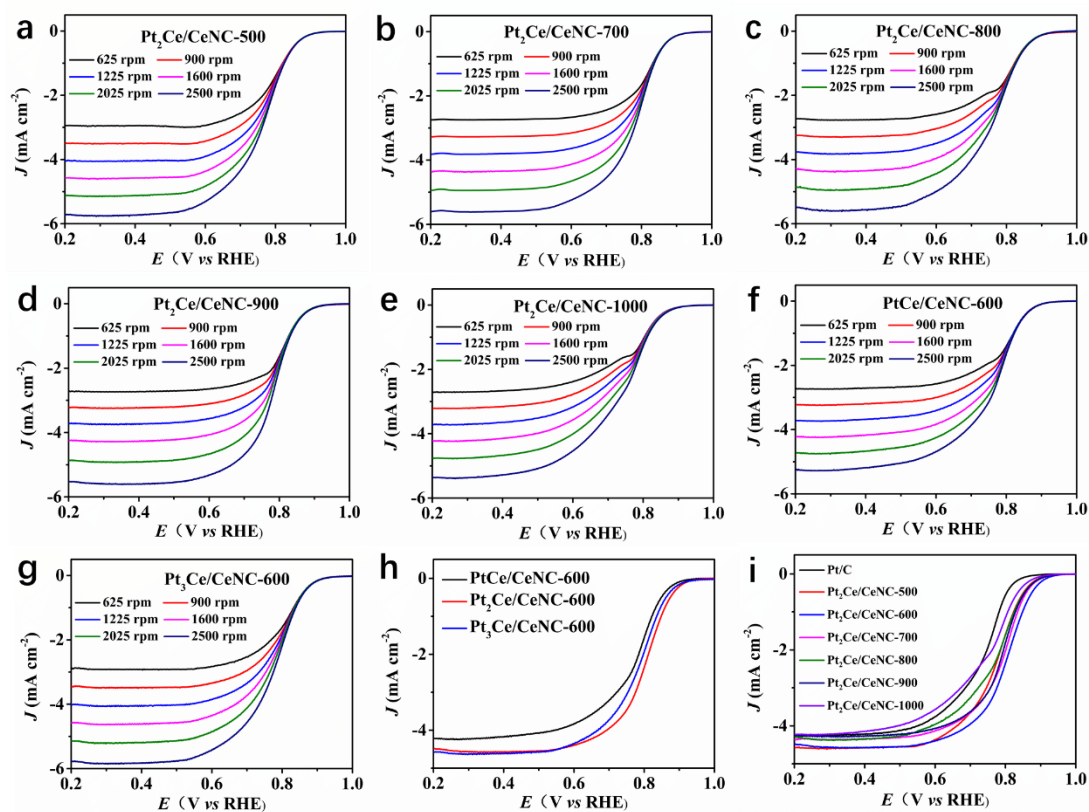

**Figure S14.** LSV of all comparative samples.

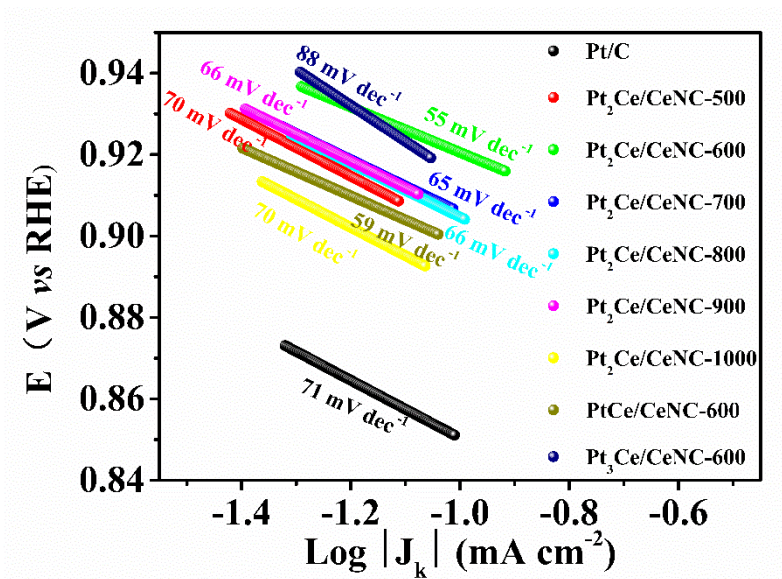

**Figure S15.** Tafel plots of all comparative samples.

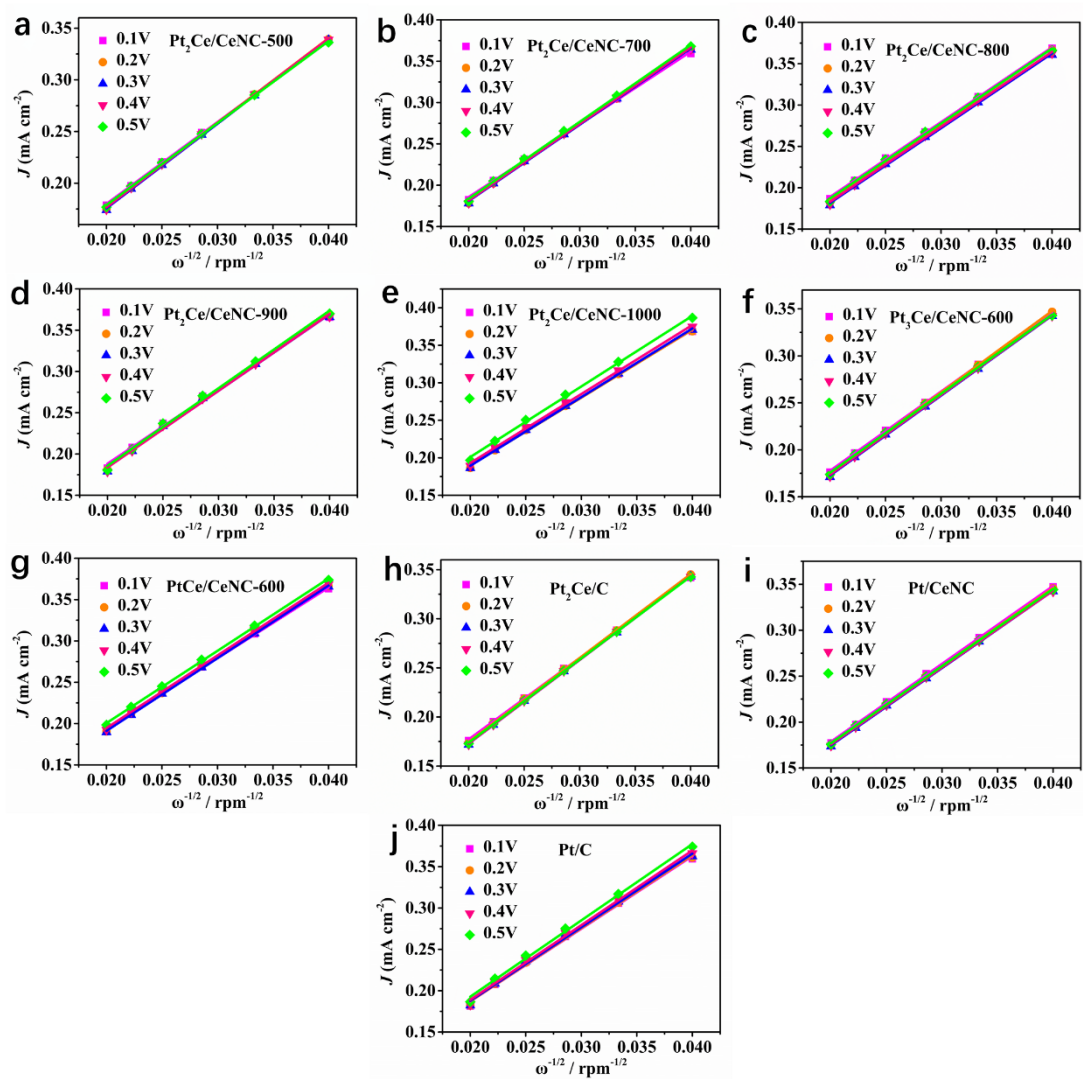

**Figure S16.** K-L equation of all comparative samples.

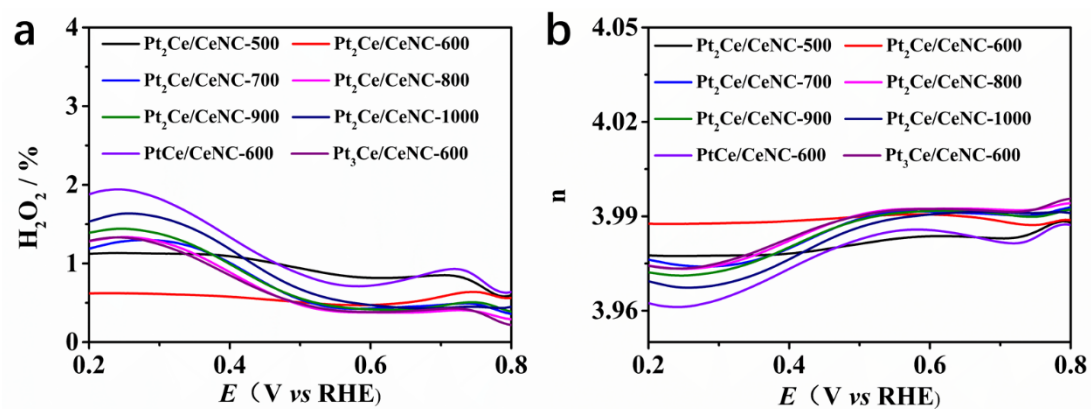

200 **Figure S17.** (a)  $\text{H}_2\text{O}_2$  yield of all comparative samples. (b) Electron-  
 201 transfer number of all comparative samples.

202

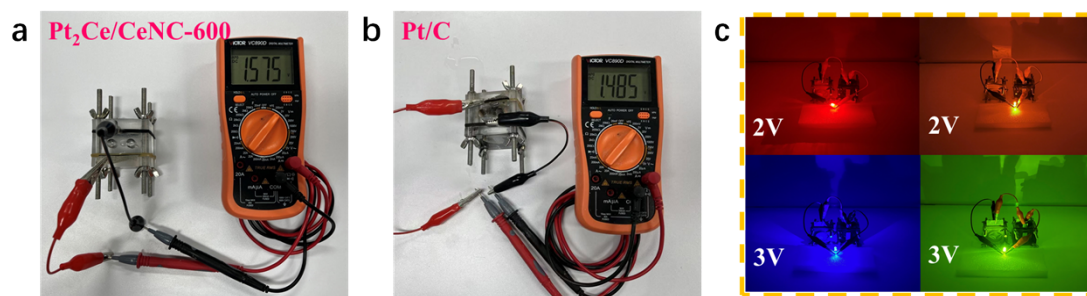

203

204 **Figure S18.** (a) Open-circuit voltage of Pt<sub>2</sub>Ce/CeNC-600. (b) Open-  
 205 circuit voltage of Pt/C. (c) Photograph of lighting a light-emitting diode  
 206 (2.0–3.0 V) by connecting two Pt<sub>2</sub>Ce/CeNC-600 based ZABs in series.

207

208 **Table S1.** Elemental composition of the Pt<sub>2</sub>Ce/CeNC-600 measured by

209 ICP-MS.

| Catalysts                   | Pt (wt. %) | Ce (wt. %) |
|-----------------------------|------------|------------|
| Pt <sub>2</sub> Ce/CeNC-600 | 21.67%     | 0.14%      |

210
